# Supplementary material for: 21 st century global glacier evolution under CMIP6 scenarios and the role of glacier-specific observations
Source: Copernicus journal article supplement (doi:10.5194/egusphere-2024-1013), 2024-05-06
Supplement: Supplementary file 1 [file egusphere-2024-1013-supplement.pdf]

# **SUPPLEMENTARY MATERIAL FOR**

## **21<sup>st</sup> century global glacier evolution under CMIP6 scenarios and the role of glacier-specific observations**

5 Harry Zekollari<sup>1,2,3,4</sup>, Matthias Huss<sup>1,2,5</sup>, Lilian Schuster<sup>6</sup>, Fabien Maussion<sup>6,7</sup>, David R. Rounce<sup>8</sup>, Rodrigo Aguayo<sup>3</sup>, Nicolas Champollion<sup>9</sup>, Loris Compagno<sup>1,2,10</sup>, Romain Hugonnet<sup>1,2,11</sup>, Ben Marzeion<sup>12,13</sup>, Seyedhamidreza Mojtabavi<sup>12,14</sup>, Daniel Farinotti<sup>1,2</sup>

<sup>1</sup> Laboratory of Hydraulics, Hydrology and Glaciology (VAW), ETH Zurich, Zurich, Switzerland

<sup>2</sup> Swiss Federal Institute for Forest, Snow and Landscape Research (WSL), Birmensdorf, Switzerland

<sup>3</sup> Department of Water and Climate, Vrije Universiteit Brussel, Brussels, Belgium

10 <sup>4</sup> Laboratoire de Glaciologie, Université libre de Bruxelles, Brussels, Belgium

<sup>5</sup> Department of Geosciences, University of Fribourg, Fribourg, Switzerland

<sup>6</sup> Department of Atmospheric and Cryospheric Sciences (ACINN), Universität Innsbruck, Innsbruck, Austria

<sup>7</sup> Bristol Glaciology Centre, School of Geographical Sciences, University of Bristol, Bristol, UK

<sup>8</sup> Department of Civil and Environmental Engineering, Carnegie Mellon University, Pittsburgh, PA, USA

15 <sup>9</sup> Institut des Géosciences de l'Environnement (IGE), CNES, Grenoble, France

<sup>10</sup> Swiss Reinsurance Company Ltd (Swiss Re), Zürich, Switzerland

<sup>11</sup> University of Washington, Civil and Environmental Engineering, Seattle, WA, USA

<sup>12</sup> Institute of Geography, University of Bremen, Bremen, Germany

<sup>13</sup> MARUM – Center for Marine Environmental Sciences, University of Bremen, Bremen, Germany

20 <sup>14</sup> Center for International Development and Environmental Research, Justus Liebig University of Giessen, Giessen, Germany

*Correspondence to:* Harry Zekollari (zharry@ethz.ch, harry.zekollari@vub.be)

## Supplementary material

25

### Text S1 – calculating the multi-model median values

All reported multi-(climate)model median values (most of which are over the 2015-2100 period) are obtained by first calculating the median over the climate models for every individual year and subsequently calculating the difference. This approach ensures a consistency between the displayed and the reported values (e.g., in Figure 2, Figure 4, Figure 7, Figure 8, Table 1). An alternative approach, consisting of first calculating the 2015-2100 differences for every individual climate model and then taking the multi-model median, results in identical values when the initial volume (2015) is the same, and very slight differences when the initial volume depends on the climate model. Values in Table 1 in some cases very slightly differ from those in Table S5 in Rounce et al. (2023), since in Rounce et al. (2023) the initial volume slightly varies, and first the 2015-2100 differences are calculated for every climate model and then the median is calculated. The 95% confidence interval is defined as the range: mean value  $\pm$  1.96  $\sigma$  (in line with Rounce et al., 2023).

|               | SSP1-1.9 | SSP1-2.6 | SSP2-4.5 | SSP3-7.0 | SSP5-8.5 |
|---------------|----------|----------|----------|----------|----------|
| BCC-CSM2-MR   |          | x        | x        | x        | x        |
| CESM2-WACCM   |          | x        | x        | x        | x        |
| CESM2         |          | x        | x        | x        | x        |
| EC-Earth3-Veg | x        | x        | x        | x        | x        |
| EC-Earth3     |          | x        | x        | x        | x        |
| FGOALS-f3-L   |          | x        | x        | x        | x        |
| GFDL-ESM4     | x        | x        | x        | x        | x        |
| INM-CM4-8     |          | x        | x        | x        | x        |
| INM-CM5-0     |          | x        | x        | x        | x        |
| MPI-ESM1-2-HR |          | x        | x        | x        | x        |
| MRI-ESM2-0    | x        | x        | x        | x        | x        |
| NorESM2-MM    |          | x        | x        | x        | x        |

**Table S 1:** Future climate scenarios, consisting of 51 combinations of 12 climate models (rows) and 5 SSPs (columns). For SSP1-1.9, given the very lower number of members (n=3), the results are not deemed representative for this emission scenario, and are therefore not discussed in this study (the glacier projections under SSP1-1.9 can however be accessed; see ‘Data availability’ section).

| <b>RGI region</b>               | <b><math>c_{prec}</math> initial value</b> | <b><math>c_{prec}</math> lower boundary</b> | <b><math>c_{prec}</math> higher boundary</b> |
|---------------------------------|--------------------------------------------|---------------------------------------------|----------------------------------------------|
| 01- Alaska                      | 1.5                                        | 1.0                                         | 2.0                                          |
| 02 - Western Canada and US      | 1.6                                        | 1.1                                         | 2.1                                          |
| 03 - Arctic Canada North        | 1.6                                        | 1.1                                         | 2.1                                          |
| 04 - Arctic Canada South        | 1.8                                        | 1.3                                         | 2.2                                          |
| 05 – Greenland periphery        | 1.6                                        | 1.1                                         | 2.1                                          |
| 06 - Iceland                    | 1.8                                        | 1.4                                         | 2.2                                          |
| 07 - Svalbard                   | 1.5                                        | 1.0                                         | 2.0                                          |
| 08 - Scandinavia                | 1.8                                        | 1.2                                         | 2.2                                          |
| 09 - Russian Arctic             | 1.5                                        | 1.0                                         | 2.0                                          |
| 10 - North Asia                 | 2.0                                        | 1.7                                         | 2.8                                          |
| 11 - Central Europe             | 1.7                                        | 1.3                                         | 2.3                                          |
| 12 – Caucasus and Middle East   | 2.0                                        | 1.6                                         | 2.6                                          |
| 13 - Central Asia               | 1.5                                        | 1.0                                         | 2.0                                          |
| 14 - South Asia West            | 1.7                                        | 1.2                                         | 2.2                                          |
| 15 - South Asia East            | 1.5                                        | 1.0                                         | 2.0                                          |
| 16 - Low Latitudes              | 1.0                                        | 0.5                                         | 1.5                                          |
| 17 - Southern Andes             | 1.7                                        | 1.2                                         | 2.2                                          |
| 18 - New Zealand                | 1.8                                        | 1.4                                         | 2.4                                          |
| 19 – Antarctic and subantarctic | 1.2                                        | 0.8                                         | 1.8                                          |

**Table S 2:** Initial values and boundaries between which the multiplicative precipitation parameter ( $c_{prec}$ ) is allowed to vary for individual glaciers during the calibration procedure of GloGEM. These region-specific boundaries are chosen in order to draw results towards observed accumulation rates from in-situ measurements.

|                                 | 2015-2050 |          |          | 2015-2100 |          |          |
|---------------------------------|-----------|----------|----------|-----------|----------|----------|
|                                 | SSP1-2.6  | SSP2-4.5 | SSP5-8.5 | SSP1-2.6  | SSP2-4.5 | SSP5-8.5 |
| 01- Alaska                      | 41.3%     | 41.2%    | 39.6%    | 27.3%     | 14.3%    | 4.3%     |
| 02 - Western Canada and US      | 34.7%     | 35.3%    | 30.2%    | 19.7%     | 7.8%     | 0.5%     |
| 03 - Arctic Canada North        | 20.3%     | 21.0%    | 20.2%    | 41.0%     | 41.0%    | 36.2%    |
| 04 - Arctic Canada South        | 22.4%     | 23.3%    | 23.1%    | 29.4%     | 22.1%    | 11.5%    |
| 05 – Greenland periphery        | 33.8%     | 34.4%    | 34.3%    | 48.2%     | 39.8%    | 21.1%    |
| 06 - Iceland                    | 29.4%     | 30.1%    | 28.2%    | 36.2%     | 30.1%    | 9.8%     |
| 07 - Svalbard                   | 35.3%     | 35.7%    | 35.2%    | 46.1%     | 36.5%    | 18.9%    |
| 08 - Scandinavia                | 19.8%     | 18.4%    | 17.3%    | 25.7%     | 16.2%    | 5.6%     |
| 09 - Russian Arctic             | 27.5%     | 28.2%    | 28.0%    | 47.2%     | 40.7%    | 22.7%    |
| 10 - North Asia                 | 30.2%     | 26.1%    | 25.1%    | 14.1%     | 5.0%     | 0.0%     |
| 11 - Central Europe             | 25.3%     | 22.5%    | 17.2%    | 16.1%     | 4.6%     | 1.1%     |
| 12 – Caucasus and Middle East   | 18.5%     | 13.0%    | 8.7%     | 4.4%      | 4.3%     | 0.0%     |
| 13 - Central Asia               | 55.1%     | 55.0%    | 54.0%    | 50.7%     | 33.4%    | 8.6%     |
| 14 - South Asia West            | 49.2%     | 48.8%    | 49.3%    | 62.9%     | 47.2%    | 10.3%    |
| 15 - South Asia East            | 40.4%     | 37.6%    | 35.3%    | 19.2%     | 8.9%     | 1.1%     |
| 16 - Low Latitudes              | 7.7%      | 6.4%     | 2.6%     | 5.6%      | 0.9%     | 0.0%     |
| 17 - Southern Andes             | 37.0%     | 36.6%    | 31.1%    | 28.6%     | 16.0%    | 5.3%     |
| 18 - New Zealand                | 12.5%     | 9.0%     | 13.8%    | 4.7%      | 1.5%     | 3.1%     |
| 19 – Antarctic and subantarctic | 33.7%     | 33.4%    | 32.4%    | 42.4%     | 41.0%    | 37.2%    |

**Table S 3:** Fraction of glaciers (>0.1 km<sup>3</sup>) for which difference in projected volume changes arising from calibration approach (i.e. calibration to glacier-specific mass balance vs. regional mass balance) exceeds 10%.

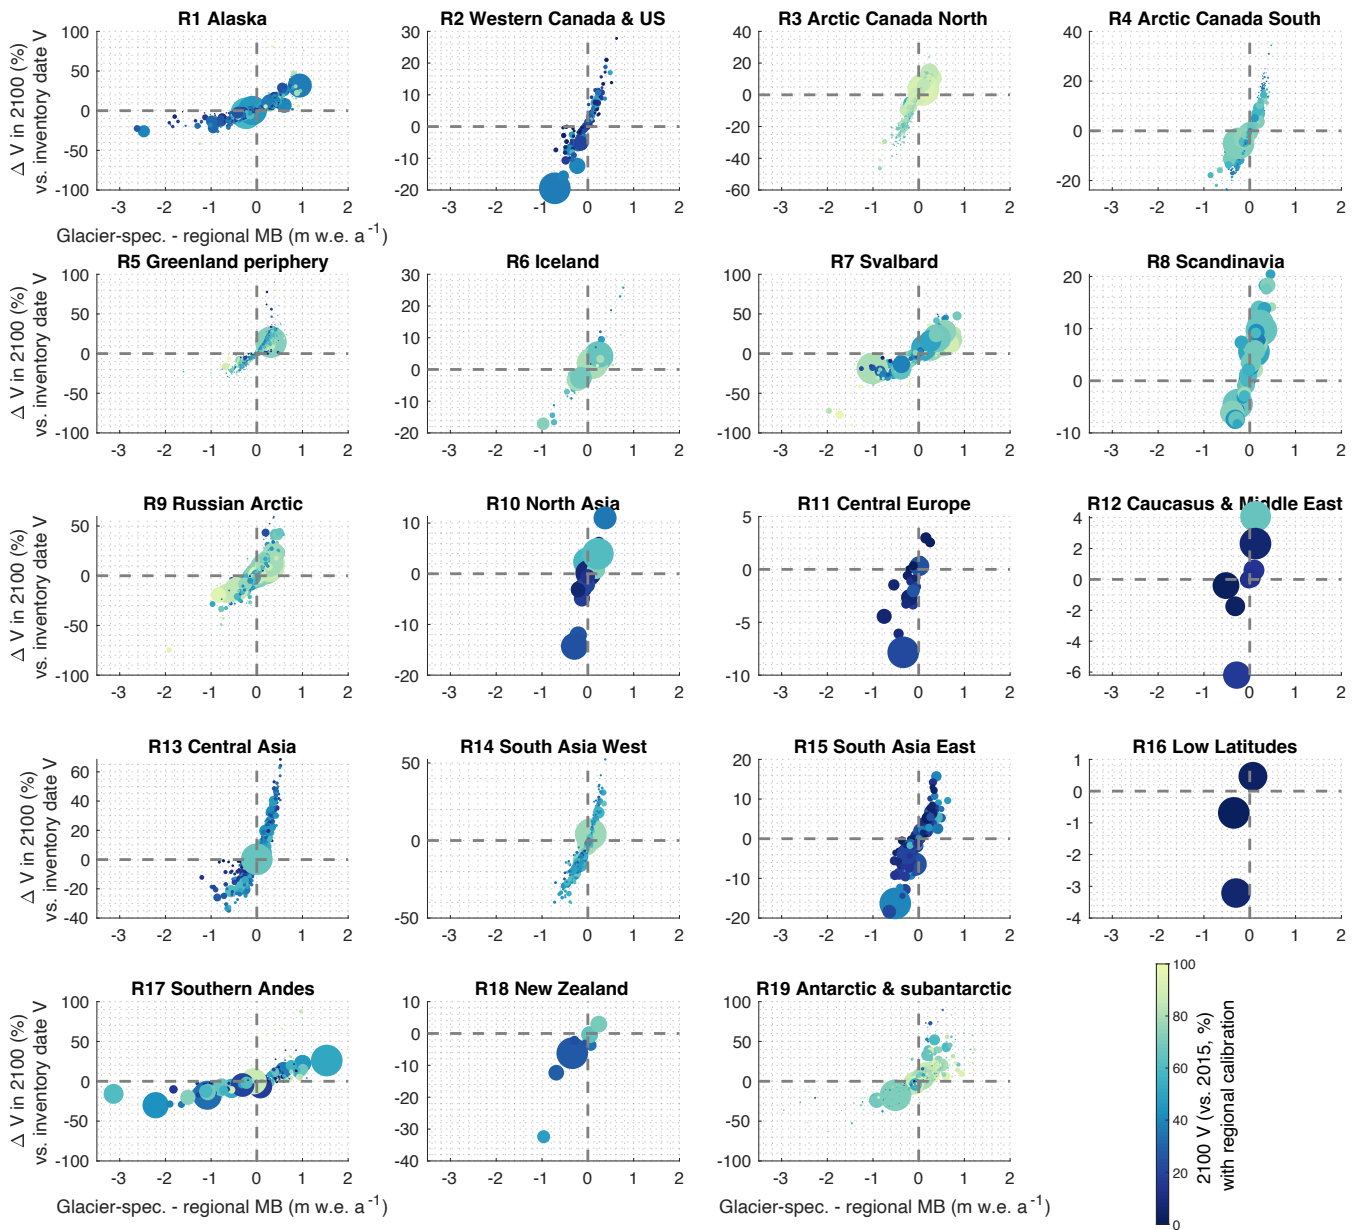

**Figure S 1:** Difference in the projected volume change (between inventory date and 2100 under SSP2-4.5) for the glacier-specific vs. regional mass balance calibration under SSP2-4.5 (multi-climate model median shown here). Every panel corresponds to an individual region from the RGI, in which every dot represents an individual glacier with a volume >1km<sup>3</sup>, where the size of the dot directly relates to the glacier size, while the colour represents the 2100 glacier volume (vs. 2015) for the projections with the regional calibration (i.e., same MB forcing for every glacier). Note that the y-axis scale differs among the panels.

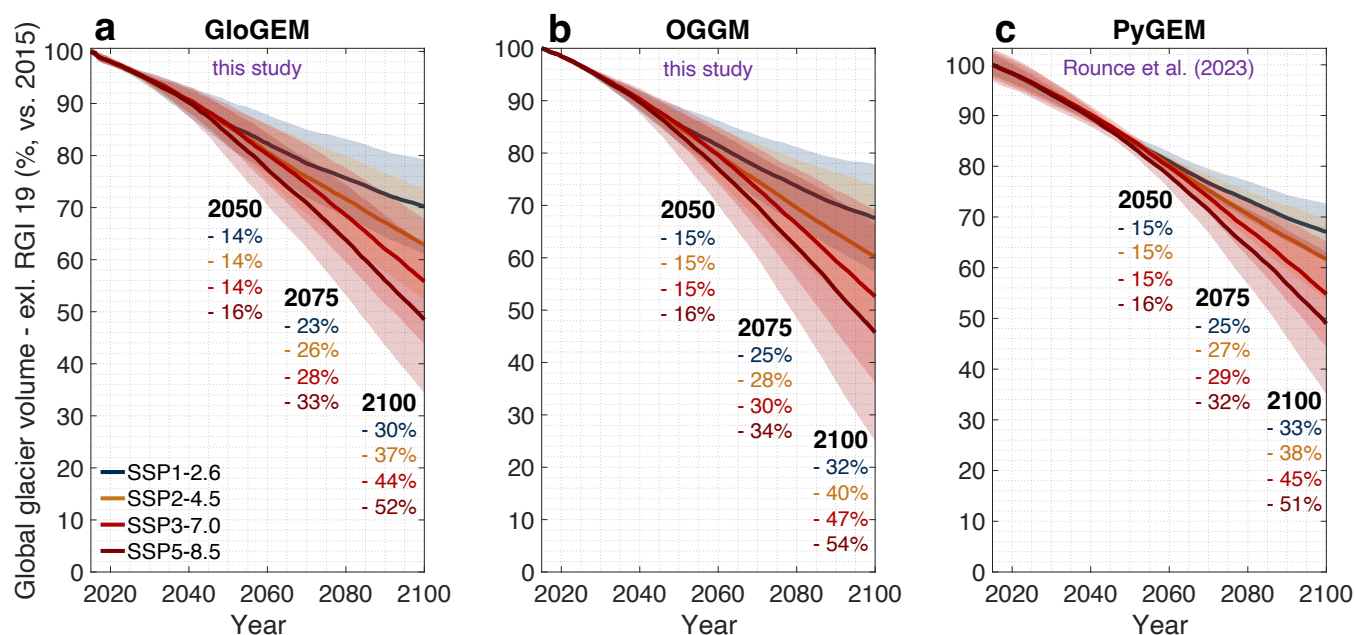

**Figure S 2:** Same as Figure 7 in main text, but excluding RGI Region 19 ‘Antarctic and Subantarctic’: Evolution of 21<sup>st</sup> century global (except for ‘Antarctic and Subantarctic’) glacier volume compared to 2015 as modelled with (a) GloGEM (this study), (b) OGGM (this study), and (c) PyGEM (Rounce et al., 2023) under various future climate projections (multi climate-model median shown for every SSP). Shading indicates  $\pm 1$  standard deviation of climate model ensemble. As opposed to GloGEM and OGGM, for PyGEM (Rounce et al., 2023) the initial volume is dependent on the climate scenario, hence the spread in projected global glacier volume from 2015 onwards.

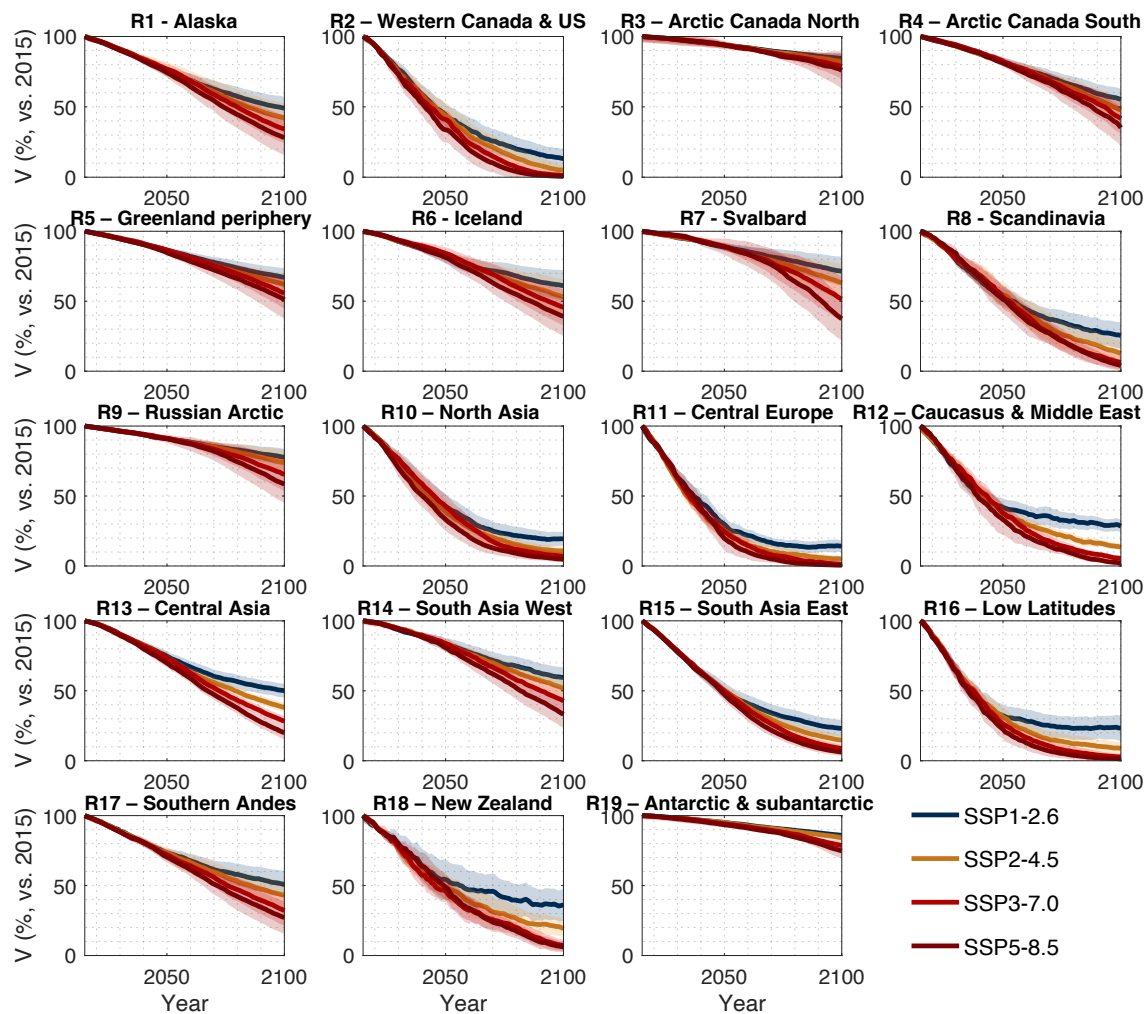

**Figure S 3:** Same as Figure 8 in main text, but here for PyGEM (Rounce et al., 2023): Evolution of 21<sup>st</sup> century glacier volume compared to 2015 as modelled with PyGEM (Rounce et al., 2023) for every region of the Randolph Glacier Inventory (RGI v6.0) under various future climate projections (multi climate-model median shown for every SSP). Shading indicates  $\pm 1$  standard deviation of climate model ensemble. In these simulations, the mass balance forcing component is calibrated for every glacier to match the glacier-specific geodetic mass balance observations by Hugonnet et al. (2021).
