# Supplementary material for: 21 st century global glacier evolution under CMIP6 scenarios and the role of glacier-specific observations
Source: Copernicus journal article supplement (doi:10.5194/egusphere-2024-1013), 2024-05-06
Supplement: Supplementary file [file egusphere-2024-1013-RC2-supplement.pdf]

This study investigates how mass balance data used for calibrating global glacier model projections affects model outcomes. Until recently, global glacier projections relied on either limited mass balance data from a small subset of glaciers or regional mass balance observations. Recent work has produced a data set of geodetic mass balances for all glaciers worldwide, thus enabling glacier-specific model calibration.

In this study the authors demonstrate that the glacier-specific and regional mass balance tuning procedures produce similar glacier projections at the regional scale, but that they (can) deviate significantly at the scale of individual glaciers. The agreement at the regional scale provides some confidence in sea level rise projections; the disagreement at small scales motivates further work aimed at refining global glacier models in order to better understand evolving water resources and natural hazards, which are more local in nature.

In addition, the paper is also one of the first to use the CMIP6 scenarios, and therefore complements a recent paper by Rounce et al.

This work is somewhat tangential to my main research interests. With that in mind, I found it a little difficult to wrap my head around the various global glacier models that are under development and considered in this paper (i.e., GloGEM, OGGM, and PyGEM). I think the paper could benefit from a clearer description of how the models differ from each other. The models are described in the text, but some of the description just points to previous publications. I'm not sure that lengthier descriptions would be necessary. Perhaps a table that lays out how the models handle mass balance and ice dynamics, while also including some of the strengths and weaknesses of each?

Other than that I felt that the paper was fairly easy to read and will make an important contribution to global glacier modeling.

### **Specific comments**

L 33–36: I assume that these results come from using the glacier-specific mass balance observations? It is a little ambiguous because the previous sentences discuss regional vs. glacier-specific observations.

L 280: Should this be “21<sup>st</sup> century”?

L 288: What is meant by “similar state independent”? It seems that something is missing from this sentence.

L 291: I see the reference to Huss and Hock, but I also think that a brief description of the method/definition of discharge is warranted here. If I understand correctly, the discharge includes precipitation plus melt over the initial glacier area (i.e., the watershed area is fixed and the discharge includes the sum of glacier runoff and nonglacier runoff). The calculation does not take into account changes in evapotranspiration over the catchment, which could be significant, especially for glaciers that experience substantial retreat through the course of the simulations, which I think should be stated.

L 331–334: Another way to say this is that the large glaciers have long response times and therefore they are farther out of equilibrium with climate. For that reason, in a warming climate I would expect to see large glaciers tending to be in the lower left corners of Figures 5a,b.

L 385: Suggest deleting “logically”.

L 462: Didn't you already state previously that Rounce et al., 2023 would be referred to as PyGEM?

L 468: There is a typo here or maybe a missing sentence? "...PyGEM. Table 1Figure 7A noteworthy distinction..."
